# Supplementary material for: Determinants of Households’ Access to Improved Drinking Water Sources: A Secondary Analysis of Eswatini 2010 and 2014 Multiple Indicator Cluster Surveys
Source: Hindawi journal article supplement (doi:10.1155/2020/6758513), 2020-03-24
Supplement: f1 [file 6758513.f1.pdf]

**Table S1:** Bivariate and multivariate logistic results of the determinants of households' access to improved drinking water sources in 2010 and 2014

| Variables                                    | The year 2010       |                  | The year 2014       |                  |
|----------------------------------------------|---------------------|------------------|---------------------|------------------|
|                                              | Logistic regression |                  | Logistic regression |                  |
|                                              | COR (95%CI)         | AOR(95%CI)       | COR (95%CI)         | AOR(95%CI)       |
| <b>Age of the HH(years)</b>                  |                     |                  |                     |                  |
| 15-34                                        | 1                   | 1                | 1                   | 1                |
| 35-54                                        | 0.76(0.70,0.83)     | 0.87(0.78,0.97)  | 0.82(0.75,0.90)*    | 0.93(0.83,1.04)  |
| 55 and above                                 | 0.52(0.47,0.58)     | 0.80(0.70,0.91)  | 0.62(0.57,0.69)*    | 0.99(0.87,1.13)  |
| <b>Sex of the HH</b>                         |                     |                  |                     |                  |
| Male                                         | 1                   | 1                | 1                   | 1                |
| Female                                       | 0.79(0.74,0.86)*    | 1.00(0.91,1.09)  | 0.81(0.75,0.87)*    | 0.91(0.83,0.99)* |
| <b>The highest education level of the HH</b> |                     |                  |                     |                  |
| No education                                 | 1                   | 1                | 1                   | 1                |
| Primary                                      | 1.14(1.02,1.28)*    | 0.92(0.81,1.04)  | 1.21(1.08,1.37)     | 1.01(0.88,1.16)  |
| Secondary                                    | 1.66(1.46,1.87)*    | 0.92(0.80,1.07)  | 1.66(1.46,1.87)*    | 1.00(0.85,1.17)  |
| High school                                  | 2.28(2.01,2.59)*    | 0.95(0.80,1.11)  | 2.42(2.13,2.75)*    | 1.09(0.91,1.30)  |
| Tertiary                                     | 2.74(2.37,3.18)*    | 0.99(0.82,1.21)  | 2.63(2.29,3.02)*    | 0.84(0.68,1.03)  |
| <b>Household size</b>                        |                     |                  |                     |                  |
| 1-3                                          | 1                   | 1                | 1                   | 1                |
| 4-6                                          | 0.68(0.62,0.74)*    | 0.89(0.80,0.98)* | 0.68(0.63,0.74)*    | 0.87(0.79,0.97)  |
| 7 and more                                   | 0.58(0.53,0.65)*    | 0.91(0.80,1.03)  | 0.55(0.50,0.61)*    | 0.87(0.76,0.99)* |
| <b>Household wealth index</b>                |                     |                  |                     |                  |
| Poorest                                      | 1                   | 1                | 1                   | 1                |
| Poor                                         | 1.83(1.57,2.13)*    | 1.68(1.44,1.97)* | 0.50(0.36,0.64)*    | 1.44(1.25,1.67)* |
| Middle                                       | 2.46(2.13,2.83)*    | 2.02(1.74,2.36)* | 0.86(0.73,0.99)*    | 1.94(1.68,2.24)* |
| Rich                                         | 3.27(2.84,3.76)*    | 2.63(2.25,3.07)* | 1.41(1.28,1.55)*    | 2.98(2.55,3.50)* |
| Richest                                      | 5.36(4.65,6.18)*    | 3.71(3.11,4.43)* | 1.85(1.71,1.99)*    | 4.58(3.76,5.57)* |
| <b>Place of residence</b>                    |                     |                  |                     |                  |
| Rural                                        | 1                   | 1                | 1                   | 1                |
| Urban                                        | 2.70(2.49,2.91)*    | 1.67(1.54,1.88)* | 3.40(3.05,3.79)*    | 2.13(1.87,2.42)* |
| <b>Region</b>                                |                     |                  |                     |                  |
| Hhohho                                       | 1                   | 1                | 1                   | 1                |

|                  |                  |                  |                  |                  |
|------------------|------------------|------------------|------------------|------------------|
| Manzini          | 0.95(0.86,1.06)  | 0.73(0.65,0.83)* | 1.12(1.02,1.23)* | 0.96(0.86,1.08)  |
| Shiselweni       | 0.43(0.38,0.48)* | 0.53(0.47,0.61)* | 0.52(0.46,0.57)* | 0.67(0.59,0.75)* |
| Lubombo          | 0.65(0.58,0.73)* | 0.67(0.59,0.76)* | 0.72(0.65,0.80)* | 0.73(0.64,0.84)* |
| Observations     |                  | 4819             |                  | 4843             |
| <b>Model fit</b> |                  |                  |                  |                  |
| AIC              |                  | 4518.92          |                  | 4812.55          |
| BIC              |                  | 4609.65          |                  | 4903.35          |

---

Notes: COR=Crude odd ratio, AOR=Adjusted odds ratio, \*Significant at  $p < 0.05$ ; HH= household head
